# Supplementary material
Source: HighWire-hosted journal article supplement (http://www.annfammed.org/highwire/filestream/8404/field_highwire_adjunct_files/0/517Supp_Table.pdf)
Supplement: 517Supp_Table.pdf [file 517Supp_Table.pdf]

**Online Supplementary Material**

Wang HHS, Wong SYS, Wong MCS, et al. Patients' experiences in different models of community health centers in Southern China. *Ann Fam Med*. 2013;11(6):517-526.

<http://www.annfammed.org/content/11/6/517>

**Supplemental Table. Sampling Framework for Primary Care Providers of Different Ownership and Management Models of Community Health Centers in Pearl River Delta (N = 1,440)**

| City                      | A          | B        | C       |
|---------------------------|------------|----------|---------|
| Primary care provider     | Government | Hospital | Private |
| No. of CHCs in total      | 32         | 45       | 10      |
| No. of districts in total | 32         | 5        | 10      |
| No. of PSU                | 4          | 4        | 4       |
| No. of SSU                | 1          | 1        | 1       |
| No. of TSU                | 1          | 1        | 1       |
| No. of participants       | 480        | 480      | 480     |
| Response rate, %          | 87.1       | 85.6     | 87.8    |

CHC = community health center; PSU = primary sampling units; SSU = secondary sampling units; TSU = tertiary sampling units.
